# Supplementary material for: A germline homozygous mutation in the base-excision repair gene NTHL1 causes adenomatous polyposis and colorectal cancer
Source: Springer Nature journal article supplement (doi:10.1038/ng.3287), 2015-05-04
Supplement: 41588_2015_BFng3287_MOESM49_ESM.pdf [file 41588_2015_BFng3287_MOESM49_ESM.pdf]

**Supplementary Table 1. Clinical characteristics of the 51 individuals included for whole-exome sequencing.**

| <b>Clinical selection</b>                    | <b>Number of individuals</b> |
|----------------------------------------------|------------------------------|
| Number of polyps                             |                              |
| Between 5 and 10 polyps                      | 3                            |
| Between 10 and 20 polyps                     | 20                           |
| Between 20 and 50 polyps                     | 22                           |
| More than 50 polyps                          | 6                            |
| Type of polyps                               |                              |
| Adenomatous polyps                           | 22                           |
| Adenomatous + hyperplastic polyps            | 22                           |
| Adenomatous + serrated polyps                | 1                            |
| Adenomatous + hyperplastic + serrated polyps | 6                            |
| Also diagnosed with colorectal cancer        |                              |
| Yes                                          | 21                           |
| No                                           | 30                           |
| Family history FDR (first degree relative)   |                              |
| Polyposis                                    | 3                            |
| CRC                                          | 12                           |
| Polyposis + CRC                              | 12                           |
| Negative/unknown                             | 24                           |

**Supplementary Table 2. Clinical characteristics of individuals included for exome sequencing.**

| Subject          | Polyp type | Polyp number | Colorectal cancer | FDR with CRC or polyposis | NS BER gene              |
|------------------|------------|--------------|-------------------|---------------------------|--------------------------|
| P07              | A          | 50           | Y                 | Y                         | <i>NTHL1</i> (p.Gln90*)  |
| P30              | A          | 30           | Y                 | Y                         |                          |
| P09              | A          | 20           | Y                 | Y                         | <i>SMUG1</i> (p.Arg124*) |
| P23              | A          | 20           | Y                 | Y                         | <i>NTHL1</i> (p.Gln90*)  |
| P01 <sup>a</sup> | A          | 15           | Y                 | Y                         | <i>NTHL1</i> (p.Gln90*)  |
| P22              | A          | 15           | Y                 | Y                         |                          |
| P15              | A          | 10           | Y                 | Y                         |                          |
| P08              | A          | 250          | Y                 | N                         |                          |
| P36              | A          | 40           | Y                 | N                         |                          |
| P03              | A          | 25           | Y                 | N                         |                          |
| P02              | A          | 20           | Y                 | N                         |                          |
| P52              | A          | 15           | Y                 | N                         |                          |
| P12              | A          | 10           | Y                 | N                         |                          |
| P42              | A          | 50           | N                 | Y                         |                          |
| P49 <sup>a</sup> | A          | 40           | N                 | Y                         | <i>NTHL1</i> (p.Gln90*)  |
| P25              | A          | 20           | N                 | Y                         |                          |
| P16              | A          | 10           | N                 | Y                         |                          |
| P31              | A          | 30           | N                 | N                         |                          |
| P34              | A          | 30           | N                 | N                         |                          |
| P58              | A          | 16           | N                 | N                         |                          |
| P19              | A          | 15           | N                 | N                         |                          |
| P57              | A          | 15           | N                 | N                         | <i>MPG</i> (p.Arg118*)   |
| P04              | A H        | 25           | Y                 | Y                         |                          |
| P20              | A H        | 15           | Y                 | Y                         |                          |
| P51              | A H        | 10           | Y                 | Y                         |                          |
| P05              | A H        | 30           | Y                 | N                         |                          |
| P28              | A H        | 25           | Y                 | N                         |                          |
| P26              | A H        | 24           | Y                 | N                         |                          |
| P24              | A H        | 20           | Y                 | N                         |                          |
| P38              | A H        | 60           | N                 | Y                         |                          |
| P44              | A H        | 50           | N                 | Y                         |                          |
| P37              | A H        | 45           | N                 | Y                         |                          |
| P32              | A H        | 30           | N                 | Y                         |                          |
| P27              | A H        | 25           | N                 | Y                         |                          |
| P46 <sup>b</sup> | A H        | 17           | N                 | Y                         |                          |
| P18              | A H        | 15           | N                 | Y                         |                          |
| P17              | A H        | 14           | N                 | Y                         |                          |
| P11              | A H        | 10           | N                 | Y                         |                          |
| P47 <sup>b</sup> | A H        | 10           | N                 | Y                         |                          |
| P45 <sup>b</sup> | A H        | 5–10         | N                 | Y                         |                          |
| P54              | A H        | 21           | N                 | N                         | <i>OGG1</i> (p.Arg131*)  |
| P53              | A H        | 15           | N                 | N                         |                          |
| P56              | A H        | 15           | N                 | N                         |                          |
| P41              | A H        | 5–10         | N                 | N                         |                          |
| P06              | A H S      | 30           | Y                 | N                         |                          |
| P43              | A H S      | 50           | N                 | Y                         |                          |
| P62              | A H S      | 9            | N                 | Y                         |                          |
| P35              | A H S      | 30           | N                 | N                         |                          |
| P29              | A H S      | 25           | N                 | N                         |                          |
| P55              | A H S      | 12           | N                 | N                         |                          |
| P14              | A S        | 10           | N                 | N                         |                          |

List is ranked based on (i) polyp type, (ii) positive history of CRC development in the index patient, (iii) positive history of CRC or polyposis development in a first degree relative (FDR) of the index patients and (iv) the number of polyps present at time of diagnosis. Polyp type: A: Adenomatous polyps, H:Hyperplastic polyps, S:Serrated polyps. Polyp number: amount of polyps present at time of diagnosis. Colorectal cancer: positive (Y) if index patient developed CRC. FDR with CRC or polyposis: first degree relatives diagnosed with CRC and/or polyps; negative (N) if available clinical data of relatives did not mention a positive history of CRC or polyposis. NS BER gene: germline nonsense variant present in one of the base excision repair genes. For two families two (a) and three (b) family members were included.

**Supplementary Table 3. Overview of exome sequencing statistics.**

| Subject | NGS platform    | Total bases sequenced (Gb) | Total bases on / near target (Gb) | % bases on target | Average coverage of targets | Median coverage | % regions $\geq 10x$ coverage | % regions $\geq 20x$ coverage |
|---------|-----------------|----------------------------|-----------------------------------|-------------------|-----------------------------|-----------------|-------------------------------|-------------------------------|
| P01     | SOLID 5500      | 5.48                       | 4.36                              | 73.72%            | 73.53                       | 57              | 93.01%                        | 84.97%                        |
| P02     | SOLID 5500      | 6.14                       | 4.91                              | 74.11%            | 82.56                       | 63.5            | 93.24%                        | 86.06%                        |
| P03     | SOLID 5500      | 6.31                       | 4.98                              | 73.01%            | 81.93                       | 63              | 93.35%                        | 86.09%                        |
| P04     | SOLID 5500      | 6.78                       | 5.44                              | 74.35%            | 89.96                       | 68              | 93.82%                        | 87.19%                        |
| P05     | SOLID 5500      | 6.75                       | 5.43                              | 74.60%            | 89.92                       | 69              | 93.97%                        | 87.75%                        |
| P06     | SOLID 5500      | 6.53                       | 5.09                              | 72.07%            | 85.16                       | 66              | 93.65%                        | 87.05%                        |
| P07     | SOLID 5500      | 6.91                       | 5.53                              | 74.15%            | 92.49                       | 71              | 94.32%                        | 88.22%                        |
| P08     | SOLID 5500      | 4.77                       | 3.81                              | 73.99%            | 63.05                       | 48              | 91.47%                        | 81.37%                        |
| P09     | SOLID 5500      | 6.56                       | 5.23                              | 73.77%            | 87.14                       | 67              | 93.56%                        | 86.72%                        |
| P11     | Illumina Hi Seq | 5.95                       | 4.91                              | 64.61%            | 77.39                       | 75              | 98.72%                        | 96.44%                        |
| P12     | Illumina Hi Seq | 6.68                       | 5.56                              | 64.71%            | 88.64                       | 85              | 98.91%                        | 97.03%                        |
| P14     | Illumina Hi Seq | 6.39                       | 5.27                              | 63.90%            | 83.95                       | 80              | 98.89%                        | 96.67%                        |
| P15     | Illumina Hi Seq | 6.82                       | 5.59                              | 63.33%            | 88.06                       | 84              | 99.04%                        | 97.10%                        |
| P16     | Illumina Hi Seq | 6.17                       | 5.13                              | 64.99%            | 78.60                       | 75              | 98.90%                        | 96.64%                        |
| P17     | Illumina Hi Seq | 6.50                       | 5.32                              | 63.18%            | 83.07                       | 79.5            | 98.79%                        | 96.53%                        |
| P18     | Illumina Hi Seq | 6.67                       | 5.54                              | 64.91%            | 91.96                       | 87              | 98.98%                        | 97.02%                        |
| P19     | Illumina Hi Seq | 7.33                       | 6.16                              | 66.18%            | 99.25                       | 95              | 99.15%                        | 97.55%                        |
| P20     | Illumina Hi Seq | 6.30                       | 5.26                              | 65.48%            | 80.08                       | 76              | 98.85%                        | 96.55%                        |
| P22     | Illumina Hi Seq | 7.15                       | 5.96                              | 65.32%            | 94.83                       | 90.5            | 99.08%                        | 97.42%                        |
| P23     | Illumina Hi Seq | 6.60                       | 5.56                              | 66.01%            | 88.32                       | 85              | 98.84%                        | 96.96%                        |
| P24     | Illumina Hi Seq | 7.30                       | 6.13                              | 66.46%            | 98.74                       | 94              | 99.16%                        | 97.56%                        |
| P25     | Illumina Hi Seq | 7.13                       | 5.88                              | 64.80%            | 93.43                       | 89              | 99.08%                        | 97.28%                        |
| P26     | Illumina Hi Seq | 5.25                       | 4.35                              | 64.89%            | 67.49                       | 64              | 98.44%                        | 95.26%                        |
| P27     | Illumina Hi Seq | 6.70                       | 5.61                              | 66.00%            | 89.73                       | 86              | 98.91%                        | 97.03%                        |
| P28     | Illumina Hi Seq | 6.89                       | 5.75                              | 65.95%            | 95.20                       | 91              | 98.91%                        | 97.04%                        |
| P29     | Illumina Hi Seq | 5.30                       | 4.43                              | 66.11%            | 69.76                       | 66              | 98.52%                        | 95.55%                        |
| P30     | Illumina Hi Seq | 5.93                       | 4.96                              | 65.68%            | 82.75                       | 79              | 98.70%                        | 96.42%                        |
| P31     | Illumina Hi Seq | 5.95                       | 4.93                              | 66.27%            | 82.55                       | 79              | 98.82%                        | 96.63%                        |
| P32     | Illumina Hi Seq | 6.72                       | 5.57                              | 65.84%            | 92.52                       | 88              | 99.01%                        | 97.13%                        |
| P34     | Illumina Hi Seq | 6.69                       | 5.54                              | 65.72%            | 89.33                       | 85              | 98.96%                        | 97.03%                        |
| P35     | Illumina Hi Seq | 6.49                       | 5.44                              | 66.12%            | 89.88                       | 86              | 98.90%                        | 96.96%                        |
| P36     | Illumina Hi Seq | 6.59                       | 5.51                              | 66.04%            | 89.65                       | 85              | 98.95%                        | 96.85%                        |
| P37     | Illumina Hi Seq | 5.90                       | 4.88                              | 65.84%            | 79.13                       | 75              | 98.81%                        | 96.33%                        |
| P38     | Illumina Hi Seq | 6.25                       | 5.21                              | 64.97%            | 85.67                       | 81              | 98.79%                        | 96.67%                        |
| P41     | Illumina Hi Seq | 6.16                       | 5.15                              | 66.73%            | 86.48                       | 82.5            | 98.90%                        | 97.01%                        |
| P42     | Illumina Hi Seq | 5.79                       | 4.83                              | 65.59%            | 75.93                       | 72              | 98.81%                        | 96.15%                        |
| P43     | Illumina Hi Seq | 6.37                       | 5.36                              | 67.08%            | 91.62                       | 87              | 99.09%                        | 97.26%                        |
| P44     | Illumina Hi Seq | 7.24                       | 6.03                              | 65.50%            | 98.67                       | 94              | 98.96%                        | 97.24%                        |
| P45     | Illumina Hi Seq | 5.37                       | 4.44                              | 65.16%            | 69.94                       | 65              | 98.56%                        | 94.92%                        |
| P46     | Illumina Hi Seq | 5.41                       | 4.53                              | 66.81%            | 83.99                       | 79.5            | 98.93%                        | 96.92%                        |
| P47     | Illumina Hi Seq | 6.65                       | 5.63                              | 67.64%            | 92.70                       | 88.5            | 98.95%                        | 97.25%                        |
| P49     | Illumina Hi Seq | 6.42                       | 5.35                              | 66.26%            | 84.96                       | 76              | 98.96%                        | 96.54%                        |
| P51     | Illumina Hi Seq | 6.76                       | 5.65                              | 65.61%            | 91.20                       | 87              | 99.04%                        | 97.15%                        |
| P52     | Illumina Hi Seq | 6.66                       | 5.54                              | 66.14%            | 90.33                       | 86              | 99.08%                        | 97.25%                        |
| P53     | Illumina Hi Seq | 6.76                       | 5.62                              | 65.81%            | 94.31                       | 90              | 99.11%                        | 97.33%                        |
| P54     | Illumina Hi Seq | 4.98                       | 4.14                              | 66.10%            | 64.22                       | 61              | 98.39%                        | 94.95%                        |
| P55     | Illumina Hi Seq | 5.61                       | 4.69                              | 65.29%            | 78.16                       | 74              | 98.72%                        | 96.39%                        |
| P56     | Illumina Hi Seq | 5.92                       | 4.94                              | 65.74%            | 79.13                       | 75              | 98.74%                        | 96.45%                        |
| P57     | Illumina Hi Seq | 5.92                       | 4.93                              | 65.71%            | 81.12                       | 77              | 98.90%                        | 96.59%                        |
| P58     | Illumina Hi Seq | 6.47                       | 5.37                              | 65.05%            | 87.48                       | 83              | 98.93%                        | 96.86%                        |
| P62     | Illumina Hi Seq | 4.87                       | 4.06                              | 66.26%            | 64.92                       | 62              | 98.44%                        | 94.89%                        |

**Supplementary Table 4. Potential deleterious variant calls in known cancer predisposing genes.**

| Gene           | Subject | mRNA accession number | mRNA change    | Protein change | Mutation type <sup>1</sup> | CRC phenotype <sup>2</sup> | Polyposis phenotype <sup>2</sup> | Co-segregation | Mode of inheritance <sup>3</sup> | Pathogenic <sup>4</sup> |
|----------------|---------|-----------------------|----------------|----------------|----------------------------|----------------------------|----------------------------------|----------------|----------------------------------|-------------------------|
| <b>APC</b>     | P35     | NM_001127510          | c.6403A>G      | p.Ile2135Val   | MSS                        | Y                          | Y                                | ND             | AD                               | N                       |
| <b>POLD1</b>   | P15     | NM_002691             | c.371T>C       | p.Val124Ala    | MSS                        | Y                          | Y                                | ND             | AD                               | N                       |
| <b>POLD1</b>   | P17     | NM_002691             | c.961G>A       | p.Gly321Ser    | MSS                        | Y                          | Y                                | ND             | AD                               | P <sup>5</sup>          |
| <b>POLE</b>    | P18     | NM_006231             | c.665G>A       | p.Arg222His    | MSS                        | Y                          | Y                                | ND             | AR/AD                            | N                       |
| <b>POLE</b>    | P35     | NM_006231             | c.850A>G       | p.Lys284Glu    | MSS                        | Y                          | Y                                | ND             | AR/AD                            | P <sup>6</sup>          |
| <b>BLM</b>     | P51     | NM_000057             | c.488C>T       | p.Ser163Phe    | MSS                        | N                          | N                                | ND             | AR                               | N                       |
| <b>MSH2</b>    | P22     | NM_000251             | c.1144C>T      | p.Arg382Cys    | MSS                        | Y                          | N                                | ND             | AR/AD                            | N                       |
| <b>MSH6</b>    | P06     | NM_000179             | c.2651C>G      | p.Ser884Cys    | MSS                        | Y                          | N                                | ND             | AR/AD                            | N                       |
| <b>PMS2</b>    | P42     | NM_000535             | c.917T>C       | p.Val306Ala    | MSS                        | Y                          | N                                | ND             | AR/AD                            | N                       |
| <b>PMS2</b>    | P05     | NM_000535             | c.620G>A       | p.Gly207Glu    | MSS                        | Y                          | N                                | ND             | AR/AD                            | N                       |
| <b>ATM</b>     | P16     | NM_000051             | c.5938G>A      | p.Gly1980Arg   | MSS                        | N                          | N                                | ND             | AR/AD                            | N                       |
| <b>ATM</b>     | P65     | NM_000051             | c.5753G>C      | p.Arg1918Thr   | MSS                        | N                          | N                                | ND             | AR/AD                            | N                       |
| <b>ATM</b>     | P15     | NM_000051             | c.1564-1565del | p.Glu522fs     | FS                         | N                          | N                                | ND             | AR/AD                            | N                       |
| <b>ATM</b>     | P20     | NM_000051             | c.1564-1565del | p.Glu522fs     | FS                         | N                          | N                                | ND             | AR/AD                            | N                       |
| <b>BRCA2</b>   | P54     | NM_000059             | c.5645C>A      | p.Ser1882*     | NS                         | N                          | N                                | ND             | AR/AD                            | N <sup>7</sup>          |
| <b>CEBPA</b>   | P34     | NM_004364             | c.827A>G       | p.Lys276Arg    | MSS                        | N                          | N                                | ND             | AD                               | N                       |
| <b>CYLD</b>    | P26     | NM_015247             | c.100C>G       | p.Gln34Glu     | MSS                        | N                          | N                                | ND             | AD                               | N                       |
| <b>DICER1</b>  | P15     | NM_030621             | c.4195A>G      | p.Lys1399Glu   | MSS                        | N                          | N                                | ND             | AD                               | N                       |
| <b>DIS3L2</b>  | P01     | NM_152383             | c.520G>A       | p.Asp174Asn    | MSS                        | N                          | N                                | N              | AR                               | N                       |
| <b>GATA2</b>   | P45     | NM_001145661          | c.82G>A        | p.Gly28Ser     | MSS                        | N                          | N                                | N              | AD                               | N                       |
| <b>KIT</b>     | P28     | NM_000222             | c.1724A>T      | p.Gln575Leu    | MSS                        | N                          | N                                | ND             | AD                               | N                       |
| <b>NF1</b>     | P08     | NM_001042492          | c.529A>G       | p.Ile177Val    | MSS                        | N                          | N                                | ND             | AD                               | N                       |
| <b>PTCH1</b>   | P17     | NM_000264             | c.1993C>T      | p.Arg665Cys    | MSS                        | N                          | N                                | ND             | AD                               | N                       |
| <b>RAD51D</b>  | P28     | NM_001142571          | c.137C>G       | p.Ser46Cys     | MSS                        | N                          | N                                | ND             | AD                               | N                       |
| <b>RHBDF2</b>  | P03     | NM_024599             | c.940G>A       | p.Ala314Thr    | MSS                        | N                          | N                                | ND             | AD                               | N                       |
| <b>TMEM127</b> | P55     | NM_001193304          | c.433G>C       | p.Gly145Arg    | MSS                        | N                          | N                                | ND             | AD                               | N                       |
| <b>TSC1</b>    | P47     | NM_000368             | c.568C>T       | p.Arg190Cys    | MSS                        | N                          | N                                | N              | AD                               | N                       |
| <b>TSC1</b>    | P45     | NM_000368             | c.568C>T       | p.Arg190Cys    | MSS                        | N                          | N                                | N              | AD                               | N                       |
| <b>TSC2</b>    | P20     | NM_000548             | c.607T>G       | p.Cys203Gly    | MSS                        | N                          | N                                | ND             | AD                               | N                       |
| <b>TSC2</b>    | P46     | NM_000548             | c.1387A>G      | p.Ile463Val    | MSS                        | N                          | N                                | N              | AD                               | N                       |
| <b>WAS</b>     | P27     | NM_000377             | c.794C>G       | p.Pro265Arg    | MSS                        | N                          | N                                | ND             | XR                               | N                       |

1) FS: frameshift variant, MSS: missense variant and NS: nonsense variant. Only missense variants with a minor allele frequency of <0.1% and phyloP score of >3.0 were selected (see online methods).

2) Presence (Y) or absence (N) of increased risk for the development of CRC or polyposis in individuals with monoallelic (autosomal dominant inheritance) or biallelic (autosomal recessive inheritance) mutations.

3) AD: Autosomal Dominant, AR: Autosomal Recessive, XR: X-linked Recessive.

4) Variant considered to be causative for observed polyposis phenotype, based on *in silico* predictions using SIFT, Align GVGD, and PolyPhen. P: possibly causative, N: not likely causative.

5) Variant located in the exonuclease domain of POLD1 (aa 304–517); SIFT: Deleterious (score: 0), Align GVGD: C55 (GV: 0.00 - GD: 55.27) and PolyPhen2: possibly damaging (score: 0.880).

6) Variant located in the exonuclease domain of POLE (aa 268–471); SIFT: Deleterious (score: 0), Align GVGD: Class C0 (GV: 353.86 - GD: 0.00), and PolyPhen2: probably damaging (score: 1.000).

7) Patient diagnosed with breast cancer at young age and has a positive family history of early onset BC. Increased risk for polyposis and CRC is unlikely. Mutation was known prior to exome sequencing.

All variants were observed in a heterozygous state and no signs of compound heterozygosity was found. For applied selection criteria, see main text.

**Supplementary Table 5a. Genes with protein-truncating heterozygous variant calls in multiple unrelated individuals.**

| Gene            | Subjects                | Number of variants | CPG | mRNA accession number | mRNA change                 | Protein changes         |
|-----------------|-------------------------|--------------------|-----|-----------------------|-----------------------------|-------------------------|
| <i>ATM</i>      | P15,P20                 | 1                  | Y   | NM_000051             | c.1564-1565del              | p.Glu522fs              |
| <i>ATXN3</i>    | P34;P54                 | 2                  | N   | NM_004993             | c.915_916ins20; c.873del    | p.Gly306fs; p.Lys291fs  |
| <i>C14orf37</i> | P06;P20                 | 1                  | N   | NM_001001872          | c.698del                    | p.Thr233fs              |
| <i>CALCR</i>    | P03;P38                 | 1                  | N   | NM_001164737          | c.1460del                   | p.Asn487fs              |
| <i>GRIN3B</i>   | P32;P36                 | 2                  | N   | NM_138690             | c.3085_3086insGA; c.2211dup | p.Pro1029fs; p.Lys738fs |
| <i>MMP25</i>    | P42;P55                 | 1                  | N   | NM_022468             | c.352C>T                    | p.Arg118*               |
| <i>OR4S1</i>    | P49;P54                 | 2                  | N   | NM_001004725          | c.831_832del; c.50_51insC   | p.Pro278fs; p.Glu17fs   |
| <i>PGL5</i>     | P02;P11                 | 2                  | N   | NM_012088             | c.640-1G>T; c.550C>T        | p.?.; p.Gln184*         |
| <i>RBFOX3</i>   | P15;P24;P25;P29;P44;P55 | 1                  | N   | NM_001082575          | c.26_29del                  | p.Gln9fs                |
| <i>SSPO</i>     | P02;P31                 | 2                  | N   | NM_198455             | c.7682G>A; c.2626del        | p.Trp2561*; p.Pro876fs  |
| <i>TAS2R46</i>  | P18;P20                 | 1                  | N   | NM_176887             | c.262del                    | p.Trp88fs               |
| <i>TLL2</i>     | P26;P57                 | 2                  | N   | NM_012465             | c.1268-1G>A; c.1201dup      | p.?.; p.Ser401fs        |
| <i>TTC3</i>     | P29;P30                 | 2                  | N   | NM_001001894          | c.1066C>T; c.5268_5271dup   | p.Arg356*; p.Thr1758fs  |
| <i>WDR63</i>    | P07;P26                 | 2                  | N   | NM_145172             | c.1917+1G>A; c.1956dup      | p.?.; p.Asp653fs        |

CPG: cancer predisposing gene.

**Supplementary Table 5b. Homozygous variant calls resulting in protein truncation.**

| Gene           | Subject                  | mRNA accession number | mRNA change        | Protein change | Coverage               | %Var. Reads                 | Mutation Type | CPG | Rec. | Co-segr. |
|----------------|--------------------------|-----------------------|--------------------|----------------|------------------------|-----------------------------|---------------|-----|------|----------|
| <i>AHCTF1</i>  | P24                      | NM_015446             | c.6419-2A>C        | p.?            | 62                     | 100                         | CSS           | N   | 1    | ND       |
| <i>ATXN3</i>   | P34                      | NM_004993             | c.916_917insC      | p.Gly306fs     | 120                    | 76.6                        | FS            | N   | 1    | ND       |
| <i>CAMKK2</i>  | P43<br>P45               | NM_001270486          | c.1614_1615insAAAA | p.Gly539fs     | 106<br>69              | 95.7<br>100                 | FS            | N   | 2    | N        |
| <i>CDCP2</i>   | P33                      | NM_201546             | c.1224_1225insGC   | p.Met409fs     | 64                     | 100                         | FS            | N   | 1    | ND       |
| <i>COL28A1</i> | P07                      | NM_001037763          | c.882+1G>T         | p.?            | 98                     | 74                          | CSS           | N   | 1    | ND       |
| <i>COL6A6</i>  | P42                      | NM_001102608          | c.1282+1G>C        | p.?            | 75                     | 73.3                        | CSS           | N   | 1    | ND       |
| <i>CTSA</i>    | P15                      | NM_000308             | c.107_108del       | p.Leu36fs      | 68                     | 73.9                        | FS            | N   | 1    | ND       |
| <i>DCHS2</i>   | P23                      | NM_017639             | c.6024dup          | p.Tyr2009fs    | 33                     | 76.7                        | FS            | N   | 1    | ND       |
| <i>MROH6</i>   | P25<br>P33<br>P39        | NM_001100878          | c.2027dup          | p.Cys677fs     | 11<br>16<br>10         | 72.7<br>85.7<br>100         | FS            | N   | 3    | ND       |
| <i>MRPS18C</i> | P20                      | NM_016067             | c.150+2T>G         | p.?            | 37                     | 81.08                       | CSS           | N   | 1    | ND       |
| <i>MTCH1</i>   | P47<br>P49               | NM_001271641          | c.30del            | p.Trp11fs      | 16<br>27               | 73.3<br>100                 | FS            | N   | 2    | N        |
| <i>MZT2A</i>   | P26<br>P52               | NM_001085365          | c.33del            | p.Ser12fs      | 12<br>11               | 83.3<br>100                 | FS            | N   | 2    | ND       |
| <i>NTHL1</i>   | P01<br>P07<br>P23<br>P49 | NM_002528             | c.268C>T           | p.Gln90*       | 26<br>39<br>119<br>168 | 73.1<br>84.6<br>99.2<br>100 | NS            | N   | 4    | Y        |
| <i>ORAI1</i>   | P12                      | NM_032790             | c.141_142insT      | p.Pro47fs      | 36                     | 76.5                        | FS            | N   | 1    | ND       |
| <i>PIF1</i>    | P62                      | NM_025049             | c.145G>T           | p.Glu49*       | 11                     | 72.7                        | NS            | N   | 1    | N        |
| <i>RASAL3</i>  | P11                      | NM_022904             | c.1239_1252del     | p.Ala414fs     | 28                     | 73.7                        | FS            | N   | 1    | ND       |
| <i>SAMD1</i>   | P22                      | NM_138352             | c.336_337insC      | p.Ala113fs     | 10                     | 90                          | FS            | N   | 1    | ND       |
| <i>ZNF84</i>   | P01                      | NM_003428             | c.2192_2193del     | p.Arg731fs     | 14                     | 78.6                        | FS            | N   | 1    | N        |

CPG: cancer predisposing gene, Rec.: number of times the specific variant was observed in our cohort, Co-segr.: co-segregation of variant with disease in family (ND: not determined, N: no co-segregation, Y: co-segregation confirmed). NS: nonsense variant, FS: frameshift (insertion or deletion) and CSS: canonical splice site. Variant calls with at least 10 reads and >70% variant reads are depicted.

**Supplementary Table 6. Frequency of the p.Gln90\* variant in *NTHL1* in different ethnic groups.**

| Population             | # Allele <sup>p.Gln90*</sup> | # Allele <sup>total</sup> | # Homozygotes | Allele Frequency |
|------------------------|------------------------------|---------------------------|---------------|------------------|
| European (Dutch)       | 17                           | 4,658                     | 0             | 0.003650         |
| European (Finnish)     | 25                           | 6,748                     | 0             | 0.003705         |
| European (Non-Finnish) | 154                          | 66,850                    | 0             | 0.002304         |
| Other                  | 1                            | 916                       | 0             | 0.001092         |
| Latino                 | 5                            | 11,598                    | 0             | 0.000431         |
| African                | 2                            | 10,514                    | 0             | 0.000190         |
| South Asian            | 2                            | 16,626                    | 0             | 0.000120         |
| East Asian             | 0                            | 8,740                     | 0             | 0                |
| Total                  | 206                          | 126,650                   | 0             | 0.001627         |

**Supplementary Table 7. Homozygous stretches observed in the exome data of polyposis patients.**

| Subject | Family | Total length of homozygous segments (Mb) | P-Value <sup>1</sup> | <i>NTHL1</i> homozygous segment <sup>2</sup> |
|---------|--------|------------------------------------------|----------------------|----------------------------------------------|
| P01     | A      | 7,3                                      | 0,35                 | N                                            |
| P07 *   | B      | 20,2                                     | 0,027                | Y                                            |
| P23     | C      | 25,1                                     | 0,006                | Y                                            |
| P49     | A      | 9,0                                      | 0,28                 | N                                            |

1) Compared to 200 controls to determine possible significant enrichment of homozygous segments in the corresponding exomes; one-sided, right-tailed z-test. (average length of homozygous segments in controls: 4,2Mb; StDev: 8,3).

2) Homozygous region encompassing the genomic locus of the *NTHL1* gene.

\* consanguinity confirmed based on family history. For further details: see online methods.

**Supplementary Table 8. Somatic base substitutions in comprehensive cancer panel genes in CRCs of individuals with biallelic *NTHL1* mutations.**

| Sample | Gene           | mRNA accession number | mRNA change | AA Change    | Base Subst. |
|--------|----------------|-----------------------|-------------|--------------|-------------|
| P07    | <i>APC</i>     | NM_001127510          | c.2269C>T   | p.Gln757*    | C:G>T:A     |
| P07    | <i>APC</i>     | NM_001127510          | c.4285C>T   | p.Gln1429*   | C:G>T:A     |
| P07    | <i>ERBB3</i>   | NM_001982             | c.695C>T    | p.Ala232Val  | C:G>T:A     |
| P07    | <i>ERBB4</i>   | NM_005235             | c.1183G>T   | p.Val395Phe  | C:G>A:T     |
| P07    | <i>FANCG</i>   | NM_004629             | c.1402G>A   | p.Ala468Thr  | C:G>T:A     |
| P07    | <i>KRAS</i>    | NM_033360             | c.35G>A     | p.Gly12Asp   | C:G>T:A     |
| P07    | <i>PIK3CA</i>  | NM_006218             | c.2176G>A   | p.Glu726Lys  | C:G>T:A     |
| P07    | <i>PIK3CA</i>  | NM_006218             | c.353G>A    | p.Gly118Asp  | C:G>T:A     |
| P07    | <i>RNF213</i>  | NM_001256071          | c.10853G>A  | p.Gly3618Asp | C:G>T:A     |
| P07    | <i>SEPT9</i>   | NM_001113491          | c.1321C>T   | p.Pro441Ser  | C:G>T:A     |
| P07    | <i>SYNE1</i>   | NM_033071             | c.16285A>G  | p.Lys5429Glu | T:A>C:G     |
| P07    | <i>TP53</i>    | NM_000546             | c.853G>A    | p.Glu285Lys  | C:G>T:A     |
| P07    | <i>ZNF521</i>  | NM_015461             | c.1490G>A   | p.Arg497Gln  | C:G>T:A     |
| P07    | <i>NF1</i>     | NM_001042492          | c.6678G>A   | p.Leu2226Leu | C:G>T:A     |
| P07    | <i>RNF213</i>  | NM_001256071          | c.13704G>A  | p.Val4568Val | C:G>T:A     |
| P07    | <i>SMARCA4</i> | NM_001128845          | c.4038C>T   | p.Tyr1346Tyr | C:G>T:A     |
| P07    | <i>SOX11</i>   | NM_003108             | c.693C>T    | p.Asp231Asp  | C:G>T:A     |
|        |                |                       |             |              |             |
| P23    | <i>APC</i>     | NM_001127510          | c.1909G>A   | p.Gly637Arg  | C:G>T:A     |
| P23    | <i>APC</i>     | NM_001127510          | c.4405C>T   | p.Gln1469*   | C:G>T:A     |
| P23    | <i>APC</i>     | NM_001127510          | c.3268C>T   | p.Gln1090*   | C:G>T:A     |
| P23    | <i>ARID1A</i>  | NM_006015             | c.6208C>T   | p.Gln2070*   | C:G>T:A     |
| P23    | <i>BRAF</i>    | NM_004333             | c.1780G>A   | p.Asp594Asn  | C:G>T:A     |
| P23    | <i>KRAS</i>    | NM_033360             | c.38G>A     | p.Gly13Asp   | C:G>T:A     |
| P23    | <i>PIK3CA</i>  | NM_006218             | c.1624G>A   | p.Glu542Lys  | C:G>T:A     |
| P23    | <i>PTCH1</i>   | NM_001083602          | c.3219G>A   | p.Met1073Ile | C:G>T:A     |
| P23    | <i>SMAD4</i>   | NM_005359             | c.1255G>A   | p.Gly419Arg  | C:G>T:A     |
| P23    | <i>TP53</i>    | NM_000546             | c.722C>T    | p.Ser241Phe  | C:G>T:A     |
| P23    | <i>ATR</i>     | NM_001184             | c.2850G>A   | p.Pro950Pro  | C:G>T:A     |
| P23    | <i>PTPRT</i>   | NM_133170             | c.3486G>A   | p.Ala1162Ala | C:G>T:A     |
| P23    | <i>RALGDS</i>  | NM_006266             | c.225C>T    | p.Val75Val   | C:G>T:A     |
| P23    | <i>TCF3</i>    | NM_003200             | c.1743C>T   | p.Asn581Asn  | C:G>T:A     |
| P23    | <i>TRIM33</i>  | NM_015906             | c.1914C>T   | p.Thr638Thr  | C:G>T:A     |
|        |                |                       |             |              |             |
| P69    | <i>APC</i>     | NM_001127510          | c.4285C>T   | p.Gln1429*   | C:G>T:A     |
| P69    | <i>KRAS</i>    | NM_033360             | c.35G>T     | p.Gly12Val   | C:G>A:T     |
| P69    | <i>LPHN3</i>   | NM_015236             | c.252T>G    | p.Tyr84*     | T:A>G:C     |
| P69    | <i>PIK3CA</i>  | NM_006218             | c.1624G>A   | p.Glu542Lys  | C:G>T:A     |
| P69    | <i>PIK3CG</i>  | NM_001282427          | c.1703C>A   | p.Thr568Lys  | C:G>A:T     |
| P69    | <i>ROS1</i>    | NM_002944             | c.5104G>T   | p.Val1702Phe | C:G>A:T     |
| P69    | <i>SETD2</i>   | NM_014159             | c.535G>A    | p.Glu179Lys  | C:G>T:A     |
| P69    | <i>TCF3</i>    | NM_003200             | c.1670G>A   | p.Arg557Gln  | C:G>T:A     |
| P69    | <i>TP53</i>    | NM_000546             | c.743G>A    | p.Arg248Gln  | C:G>T:A     |
| P69    | <i>BCL9</i>    | NM_004326             | c.660+1G>A  | p.?          | C:G>T:A     |
| P69    | <i>CSMD3</i>   | NM_198123             | c.8778T>A   | p.Pro2926Pro | T:A>A:T     |
| P69    | <i>ITGA9</i>   | NM_002207             | c.1299C>T   | p.Gly433Gly  | C:G>T:A     |
| P69    | <i>PRKDC</i>   | NM_006904             | c.5532G>A   | p.Val1844Val | C:G>T:A     |

**Supplementary Table 9. Somatic mutations in *APC* in colorectal adenomas of individuals with biallelic *NTHL1* mutations.**

| Sample  | mRNA change* | AA Change  | # reads Fw | # reads Rv | %Var. Reads Fw | %Var. Reads Rv | Base Subst. |
|---------|--------------|------------|------------|------------|----------------|----------------|-------------|
| P49 (2) | c.1417C>T    | p.Gln473*  | 7,463      | 9,506      | 13.1           | 13.6           | C:G>T:A     |
| P49 (1) | c.2097G>A    | p.Trp699*  | 6,011      | 1,791      | 24.6           | 34.2           | C:G>T:A     |
| P49 (3) | c.3688C>T    | p.Gln1230* | 6,609      | 6,544      | 42.2           | 42.0           | C:G>T:A     |
| P49 (3) | c.3880C>T    | p.Gln1294* | 2,306      | 2,218      | 32.8           | 54.7           | C:G>T:A     |
| P71 (2) | c.739C>T     | p.Gln247*  | 4,087      | 4,101      | 18.7           | 18.6           | C:G>T:A     |
| P71 (1) | c.2995C>T    | p.Gln999*  | 1,748      | 4,768      | 16.1           | 10.1           | C:G>T:A     |

\*NM\_001127510. Numbers between brackets represent corresponding polyp sample.

**Supplementary Table 10. Somatic base substitutions in comprehensive cancer panel genes in CRCs of individuals with biallelic *MUTYH* mutations.**

| Sample | Gene            | mRNA accession number | mRNA change | AA Change    | Base Subst. |
|--------|-----------------|-----------------------|-------------|--------------|-------------|
| MAP1   | <i>ADAMTS20</i> | NM_025003             | c.1723G>A   | p.Gly575Arg  | C:G>T:A     |
| MAP1   | <i>PIK3CG</i>   | NM_001282427          | c.1912G>T   | p.Glu638*    | C:G>A:T     |
| MAP1   | <i>SMAD4</i>    | NM_005359             | c.1572G>T   | p.Trp524Cys  | C:G>A:T     |
| MAP1   | <i>SMARCA4</i>  | NM_001128845          | c.4296G>T   | p.Met1432Ile | C:G>A:T     |
|        |                 |                       |             |              |             |
| MAP2   | <i>APC</i>      | NM_001127510          | c.4120G>T   | p.Glu1374*   | C:G>A:T     |
| MAP2   | <i>KRAS</i>     | NM_033360             | c.436G>A    | p.Ala146Thr  | C:G>T:A     |
| MAP2   | <i>NLRP1</i>    | NM_033004             | c.2415G>T   | p.Lys805Asn  | C:G>A:T     |

*MUTYH* germline mutations. MAP1: p.Pro405Leu (homozygous) and MAP2: p.Pro405Leu (heterozygous) and p.Asp161His (heterozygous).



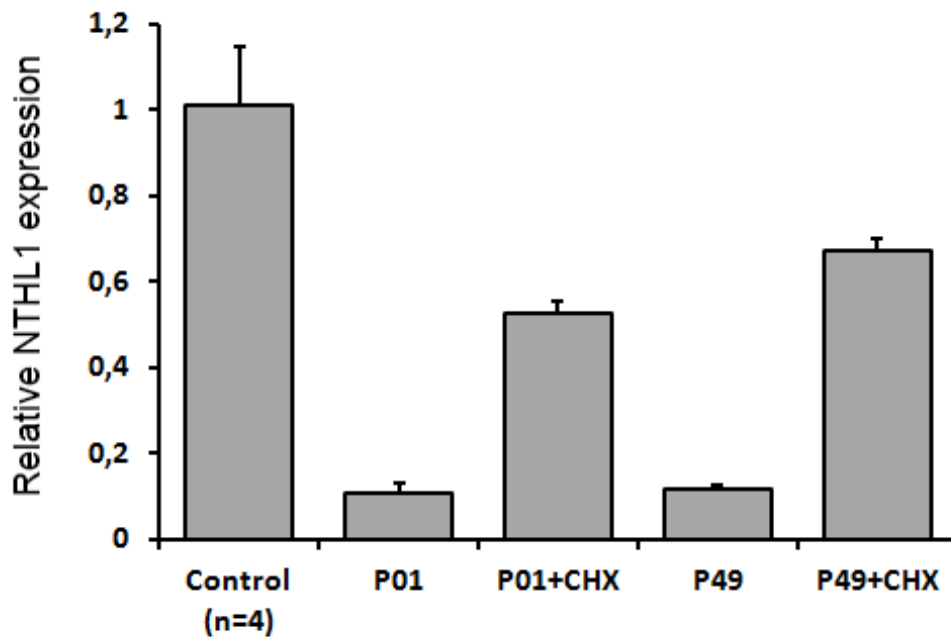

**Supplementary Figure 1. Loss of *NTHL1* RNA expression in homozygous p.Gln90\* carriers due to nonsense-mediated decay.** EBV-transformed B-lymphocytes derived from two homozygous p.Gln90\* carriers (P01 and P49, family A) show approximately ten-fold reduced *NTHL1* RNA expression compared to EBV-transformed B-lymphocytes derived from controls. Partial rescue of *NTHL1* expression is obtained after treatment with cyclohexamide (CHX) which indicates that expression is reduced due to nonsense-mediated decay. Data were normalized using the expression of the housekeeping gene *HPRT*. Experiments were performed in duplo and depicted results reflect the data obtained from two independent experiments; error bars represent the standard deviation based on the relative expression levels of *NTHL1* in all included samples.

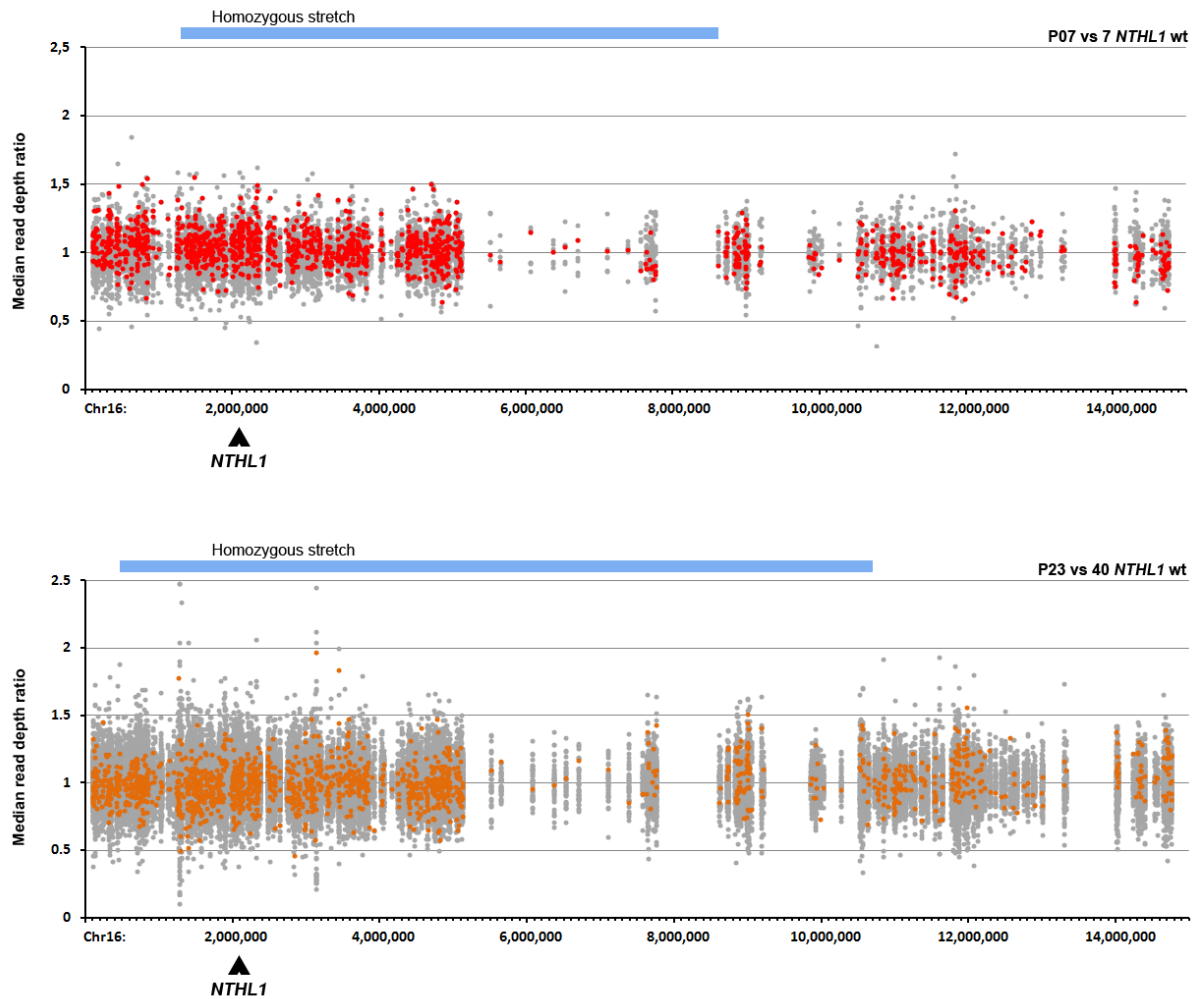

**Supplementary Figure 2. Read depth analysis of exome data.** Read depth of P07 (Top panel, red dots, SOLiD exome sequencing data) and P23 (Bottom panel, orange dots, Illumina exome sequencing data) compared to 7 and 40 *NTHL1* wild type samples, respectively (grey dots). Both P07 and P23 are homozygous around the *NTHL1* locus (blue bars; **Supplementary Fig. 6**), but median read-depth analysis of chromosome 16 shows that large genomic deletions encompassing this locus are not present.

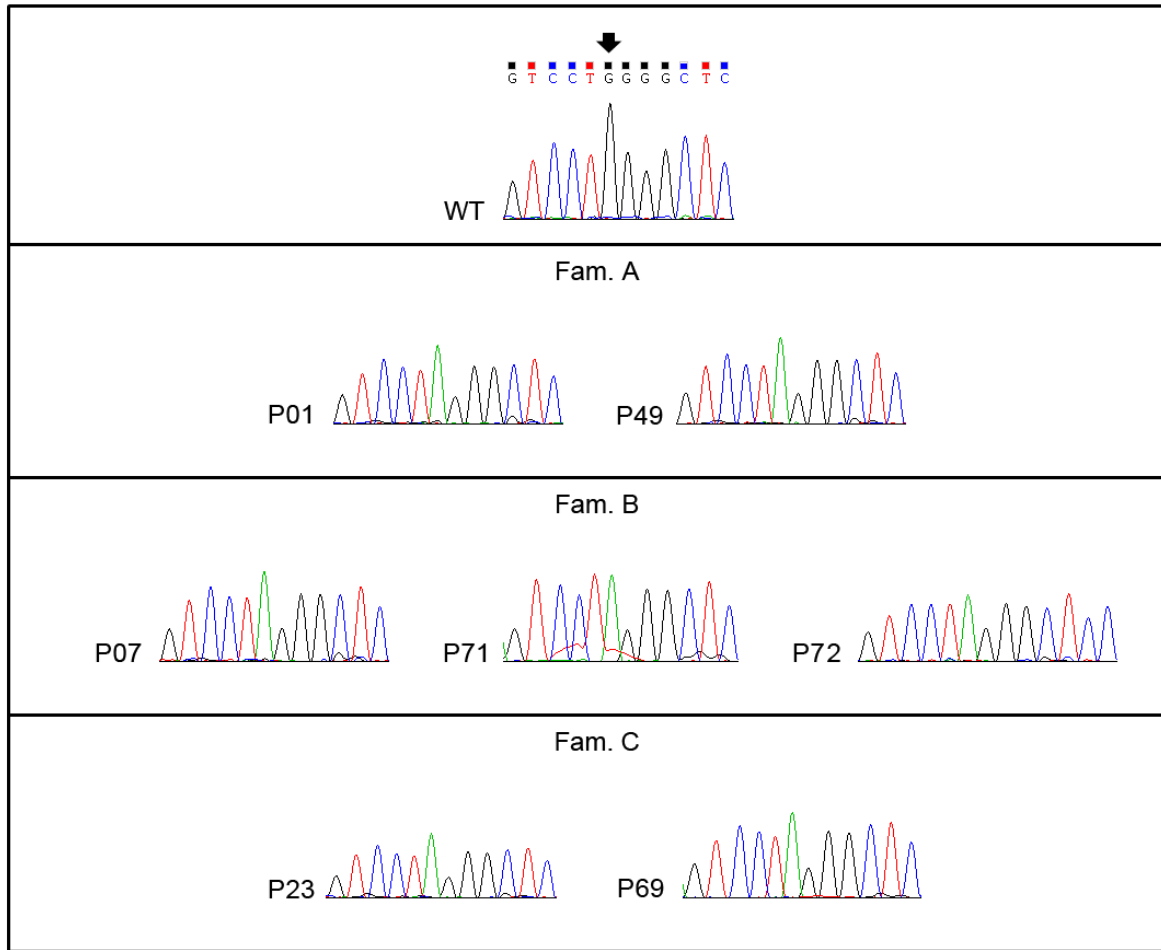

**Supplementary Figure 3. Validation and co-segregation analysis by Sanger sequencing.** The c.268C>T (p.Gln90\*) variant in *NTHL1* was present in all clinically affected members of families A (P01 and P49), B (P07, P71 and P72), and C (p23 and P69). WT: wild type control negative for the c.268C>T variant in the *NTHL1* gene. Arrow: the change of guanine to adenine results in the introduction of a stop codon.

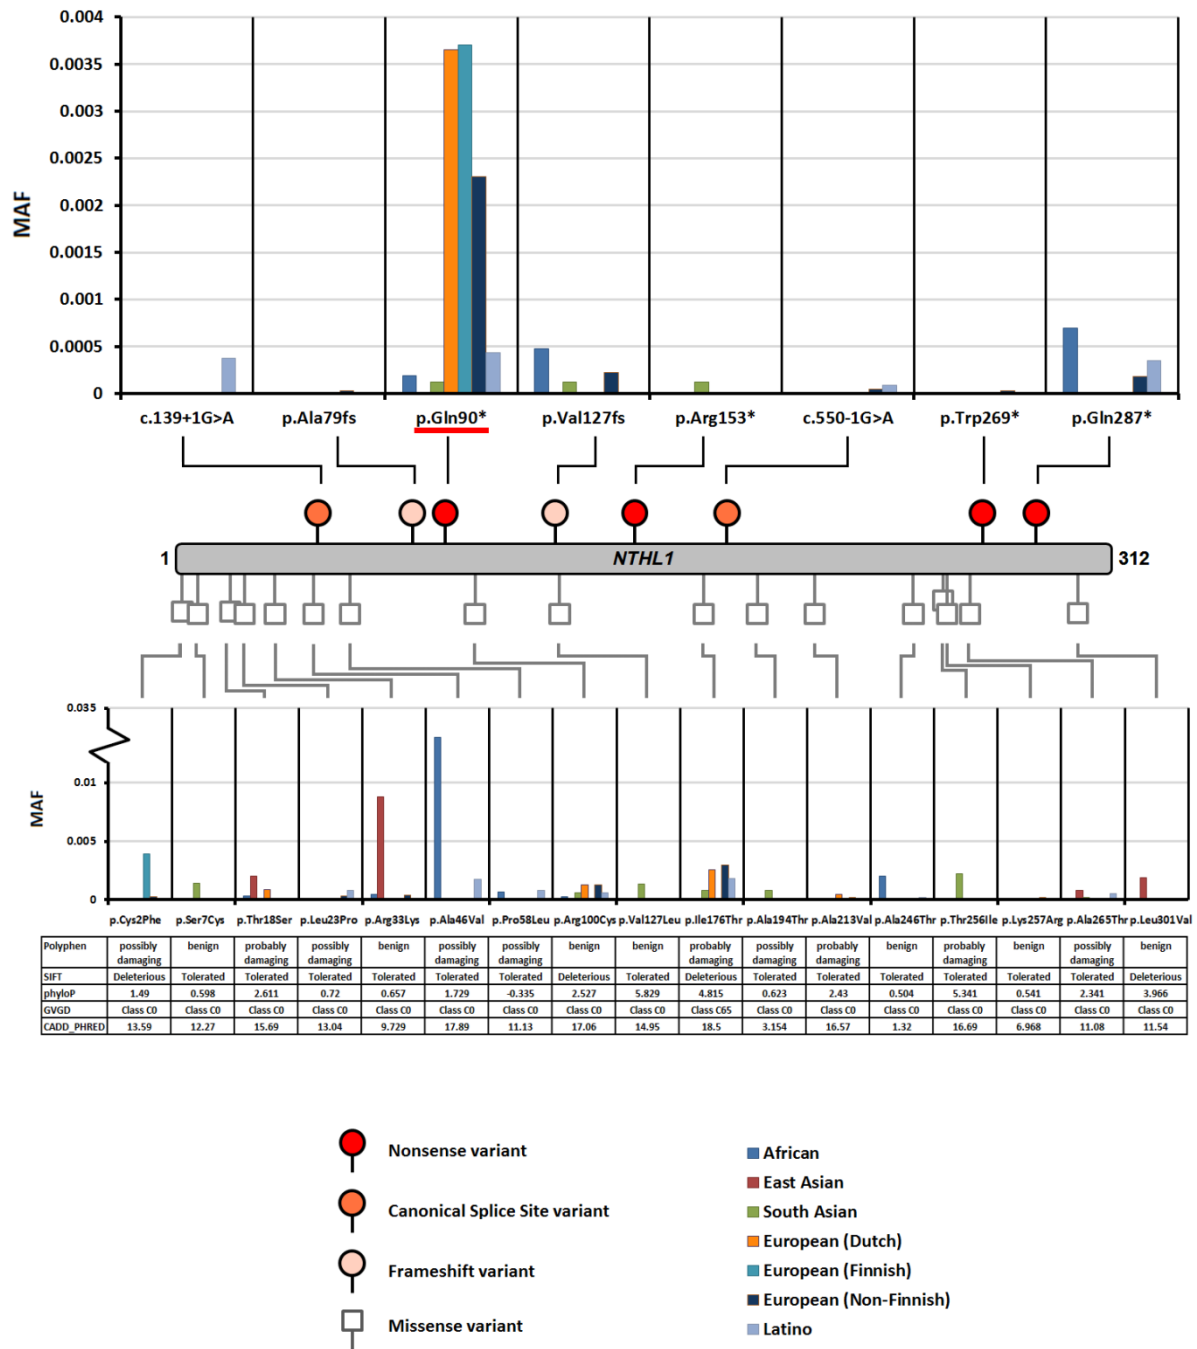

**Supplementary Figure 4. Recurrent truncating and missense variants in the *NTHL1* gene and ethnic distributions.** Upper part: eight truncating variants are recurrently ( $\geq 2$  calls) encountered in our in-house database, or the database from the Exome Aggregation Consortium [Nov., 2014 accessed]. All variants were encountered in a heterozygous state. The p.Gln90\* variant (red underlined) is present in subjects from different descent, but significantly enriched in European cohorts. Lower panel: seventeen missense variants were recurrently ( $\geq 10$  calls) encountered in our in-house- or ExAC databases. Frequencies of these variants are depicted for the different populations and, based on in-silico predictions, most of these missense variants are predicted to be benign polymorphisms.

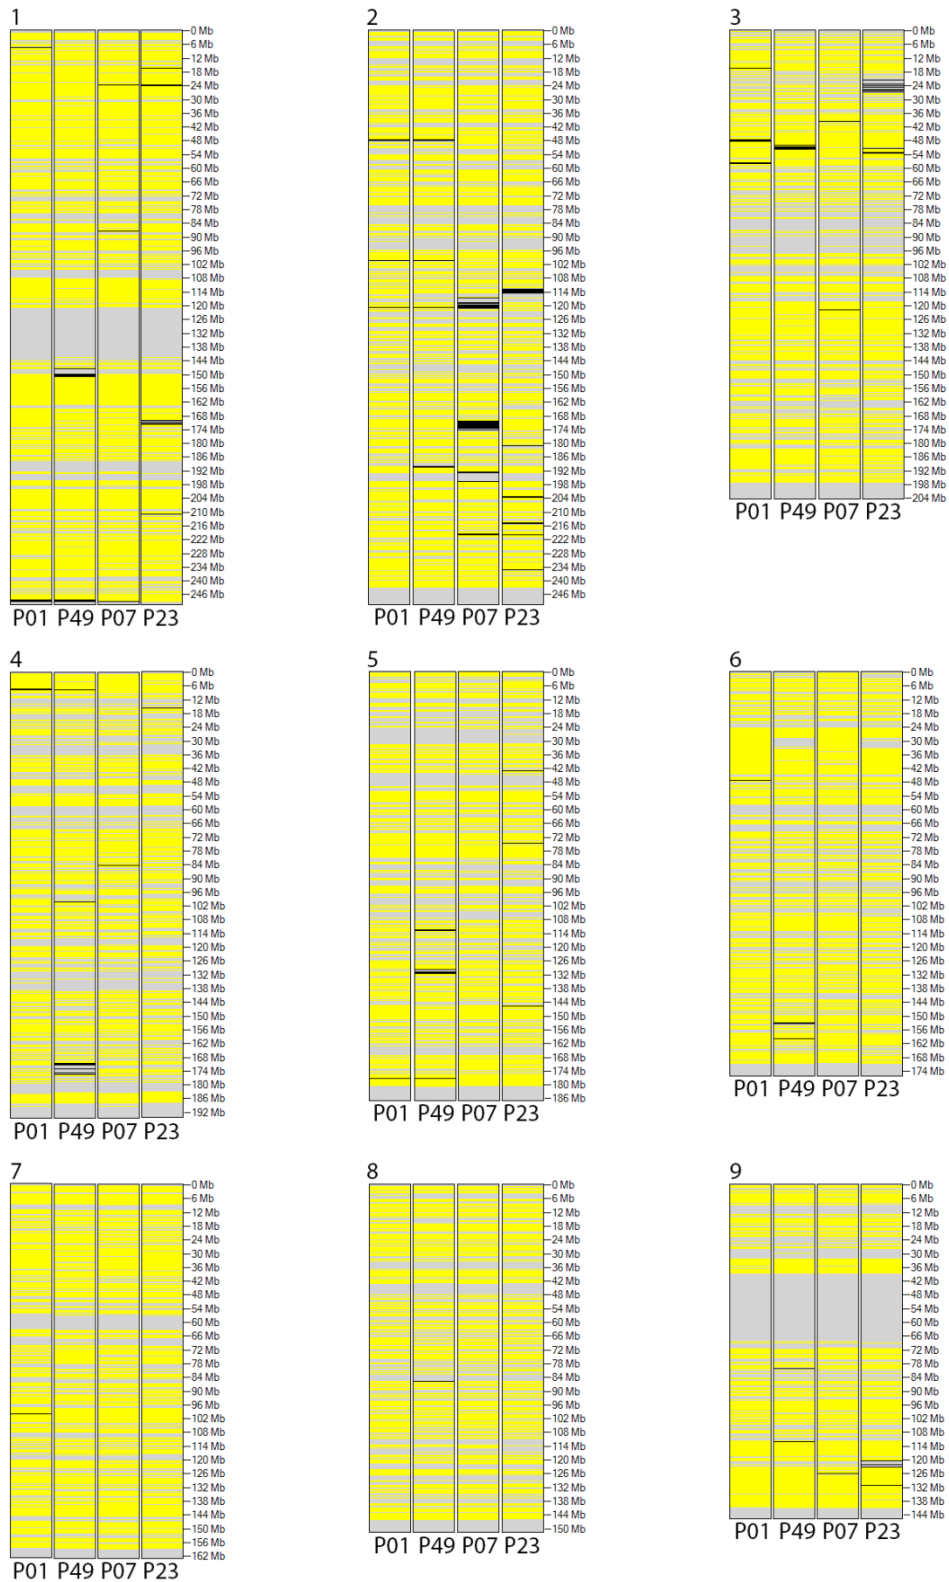

Supplementary Figure 5. Continued on next page.

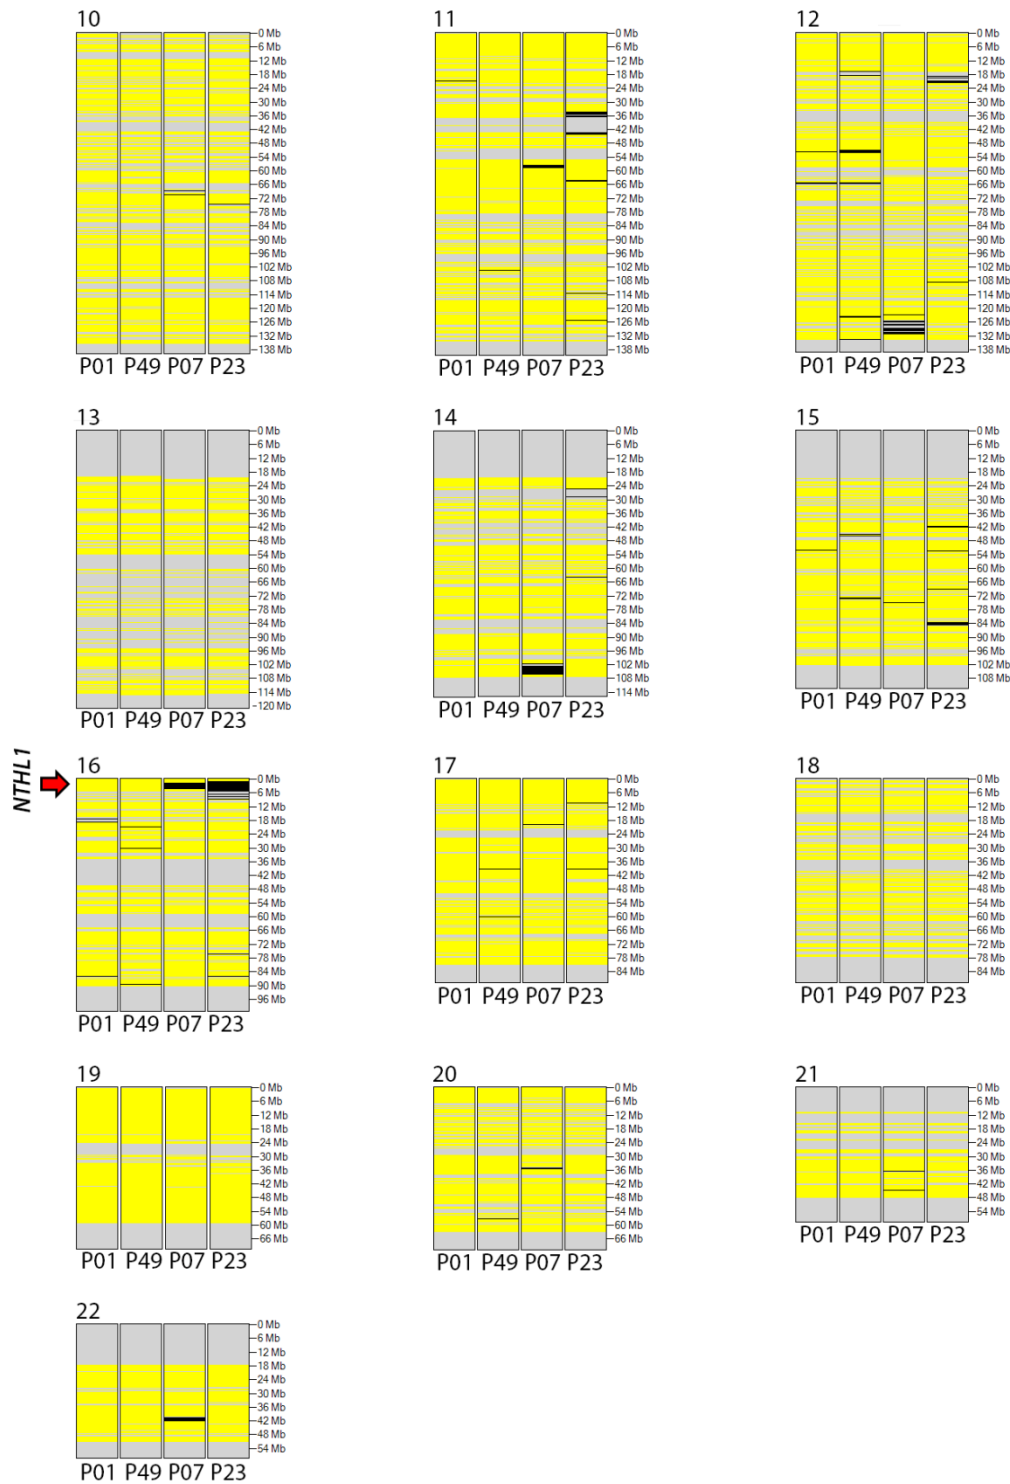

**Supplementary Figure 5. Genome-wide autozygosity mapping.** Homozygosity/autozygosity mapping based on exome data from four patients (P01, P07, P23 and P49) from three families confirms homozygous stretches (black regions) encompassing the *NTHL1* locus in P07 and P23 (red arrow). Overall, homozygous stretches were more abundant in P07 and P23 compared to P01 and P49 due to consanguinity (family B) or predicted consanguinity (family C) in these families (see supplementary table 7), but overlap of homozygous regions between P07 and P23 was only observed at the *NTHL1* locus. Yellow regions represent heterozygous regions, numbers correspond to chromosomal numbering and y-axis defines the genomic position on the corresponding chromosome. For details, see online methods.
